# Supplementary material
Source: PubMed Central journal article supplement (PMC6123661)
Supplement: EMBR-19-e45409-s001.pdf [file EMBR-19-e45409-s001.pdf]

## Appendix files

### Table of contents

#### Appendix Figures:

**Appendix Figure S1.** Data related to Figure 3. 2

**Appendix Figure S2.** Data related to Figure 7. 5

#### Appendix Tables:

**Appendix Table S1.** Summary of the *Fuz* promoter methylation in different disease models. 7

**Appendix Table S2.** SCA3 patient and control brain sample description. 8

**Appendix Table S3.** Clinical features of SCA3 cases and control individuals described in this study. 9

# Appendix Figure S1.

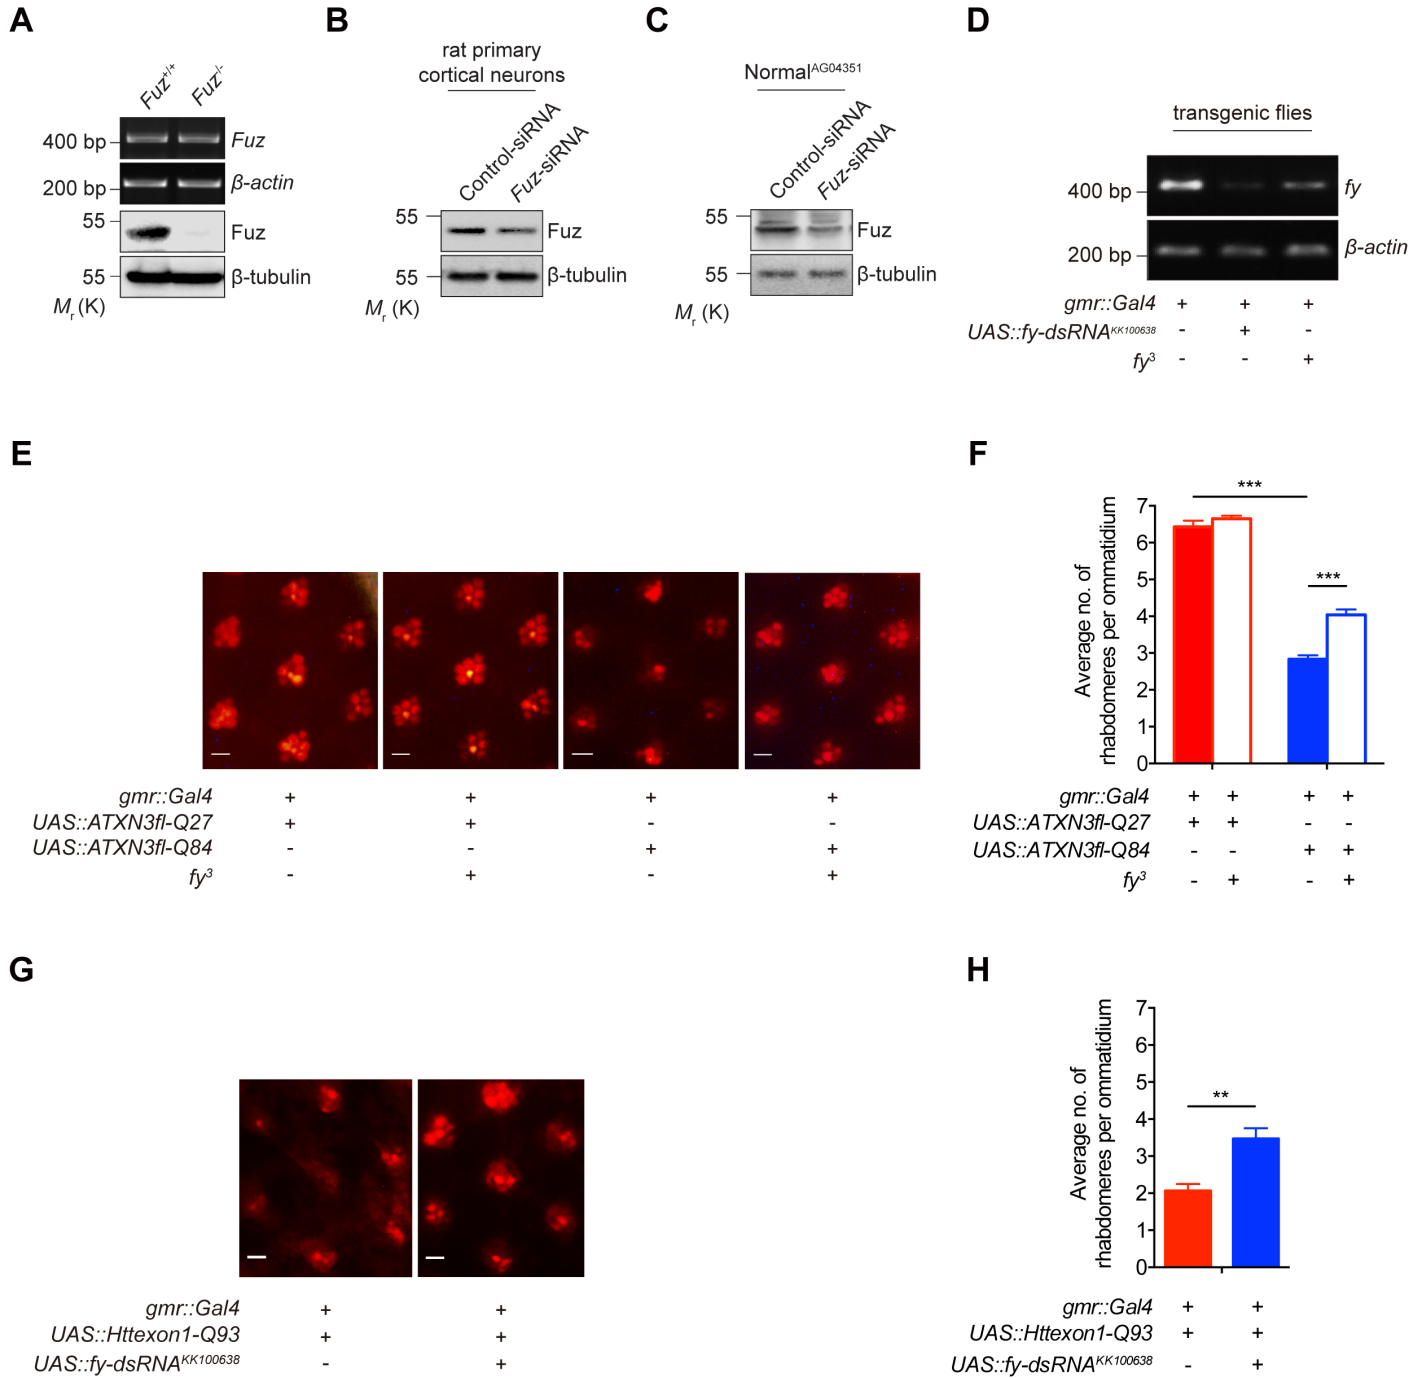

### Appendix Figure S1. Data related to Figure 3.

(A) The expression of *Fuz* transcript was not affected while Fuz protein expression was abolished in *Fuz*<sup>-/-</sup> HEK293 cells. The *Fuz*<sup>-/-</sup> HEK293 cell line was generated through CRISPR/Cas9 technique. The parental HEK293 cells were used as control. *n* = 3.

(B) Fuz protein expression was reduced in rat primary cortical neurons upon *Fuz*-siRNA treatment. *n* = 3.

(C) Knockdown of *Fuz* expression reduced the Fuz protein expression in normal fibroblasts. *n* = 3.

(D) The expression level of *fuzzy* transcript was reduced in both *fuzzy*-knockdown (*fy-dsRNA*<sup>KK100638</sup>) and *fuzzy*-knockout (*fy*<sup>3</sup>) *Drosophila* lines. *fy*<sup>3</sup> is a null allele, it carries a 70 bp deletion in the *fy* coding region [1]. *n* = 3.

(E, F) (E) Neurodegenerative phenotype in SCA3 transgenic flies were suppressed in *fy*<sup>3</sup> mutant background. The flies were of genotypes *w; gmr::Gal4 UAS::ATXN3fl-Q27/+; +/+*, *w; gmr::Gal4 UAS::ATXN3fl-Q27/fy<sup>3</sup>; +/+*, *w; gmr::Gal4/+; UAS::ATXN3fl-Q84/+* and *w; gmr::Gal4/fy<sup>3</sup>; UAS::ATXN3fl-Q84/+*. Scale bars: 5  $\mu$ m. (F) is the quantification of (E). Error bars represent S.E.M., *n* = 3. For every control or experimental group, a total of 200 ommatidia collected from 20 fly eyes were examined in each replicate. Statistical analysis was performed using one-way ANOVA followed by post-hoc Tukey's test. \*\*\* *P* < 0.001.

(G, H) (G) Knockdown of *fy* expression suppressed the neurodegeneration in HD transgenic flies. The flies were of genotypes *UAS::Httexon1-Q93; gmr::Gal4/+* and *UAS::Httexon1-Q93; gmr::Gal4/UAS::fy-dsRNA*<sup>KK100638</sup>. Scale bars: 5  $\mu$ m. (H) is the quantification of (G). Error bars represent S.E.M., *n* = 3. For every control or experimental

group, a total of 200 ommatidia collected from 20 fly eyes were examined in each replicate. Statistical analysis was performed using two-tailed unpaired Student's *t*-test. \*\*  $P < 0.01$ . Data information: *beta-actin* or beta-tubulin was used as loading control. *n* represents the number of biological replicates. Only representative images, gels and blots are shown.

## Appendix Figure S2.

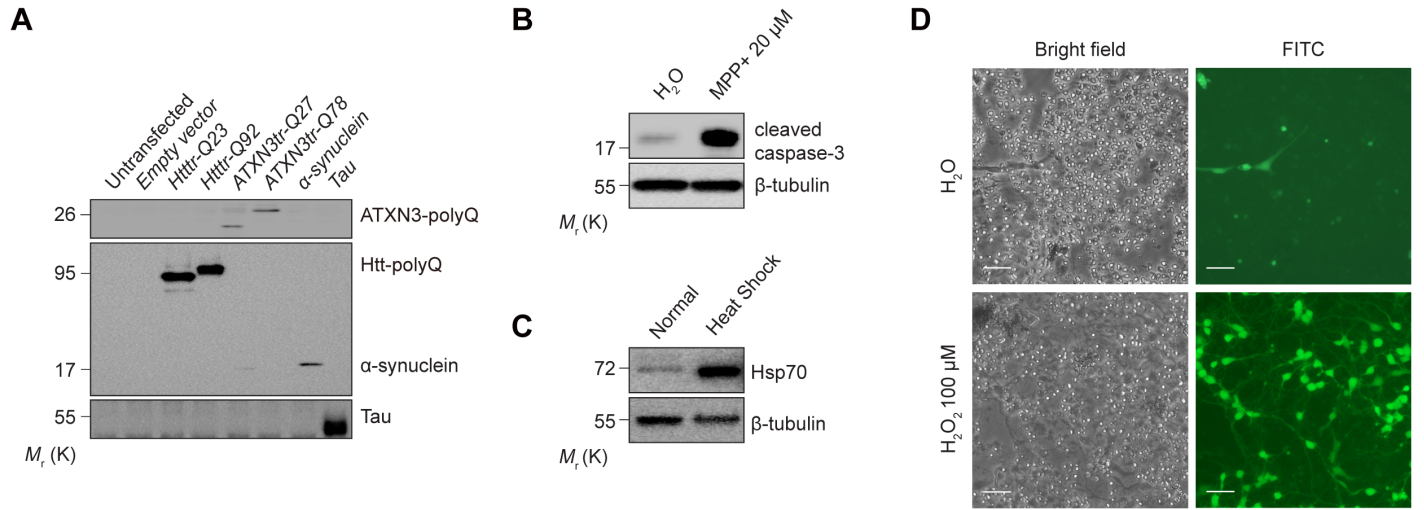

**Appendix Figure S2. Data related to Figure 7.**

(A) Western blot analysis showing the overexpression of ATXN3tr-Q27/Q78, Htttr-Q23/Q92,  $\alpha$ -synuclein and Tau proteins in rat primary cortical neurons.  $n = 3$ .

(B) Treatment of MPP<sup>+</sup> induced capsase-3 cleavage in rat primary cortical neurons.  $n = 3$ .

(C) Heat shock treatment increased the expression of heat shock protein 70 (Hsp70) in rat primary cortical neurons.  $n = 3$ .

(D) H<sub>2</sub>O<sub>2</sub> treatment increased the reactive oxygen species (ROS) production in rat primary cortical neurons. Scale bars: 50  $\mu$ m.  $n = 3$ .

Data information: Beta-tubulin was used as loading control.  $n$  represents the number of biological replicates. Only representative images and blots are shown.

**Appendix Table S1. Summary of the *Fuz* promoter methylation in different disease models.**

| <b>Disease model</b>      | <b><i>Fuz</i> promoter region</b> | <b>Methylation change</b> | <b>Hypomethylation restored by YY1 overexpression</b> |
|---------------------------|-----------------------------------|---------------------------|-------------------------------------------------------|
| expanded polyQ            | +117/+347CpG                      | hypomethylation           | Yes                                                   |
| A $\beta$ <sub>1-42</sub> | +117/+347CpG                      | hypomethylation           | Yes                                                   |
| Tau                       | +117/+347CpG                      | hypomethylation           | Yes                                                   |
| $\alpha$ -synuclein       | -1962/-1861CpG                    | hypomethylation           | No                                                    |

**Appendix Table S2. SCA3 patient and control brain sample description.**

| <b>Sample ID</b> | <b>Case ID</b> | <b>Dx</b> | <b>Age</b> | <b>Gender</b> | <b>PMI (minutes)</b> | <b>Brain Weight (grams)</b> |
|------------------|----------------|-----------|------------|---------------|----------------------|-----------------------------|
| SCA3-1           | UMB1687        | SCA3      | 50         | Male          | 1,500                | 1,410                       |
| SCA3-2           | UMB4626        | SCA3      | 64         | Male          | 720                  | 1,550                       |
| SCA3-3           | UMB5749        | SCA3      | 45         | Male          | 1,680                | 1,537                       |
| SCA3-4           | UMB5777        | SCA3      | 52         | Male          | 1,320                | n/a                         |
| SCA3-5           | UMB5856        | SCA3      | 61         | Female        | 300                  | 1,046                       |
| SCA3-6           | T5147          | SCA3      | 39         | Female        | 1,265                | 1,000                       |
| CTL-1            | T206           | Control   | 49         | Male          | 905                  | 1,325                       |
| CTL-2            | T274           | Control   | 65         | Female        | 1,422                | 1,066                       |
| CTL-3            | T99            | Control   | 44         | Male          | 2,955                | 1,817                       |
| CTL-4            | T145           | Control   | 57         | Female        | 554                  | 1,050                       |
| CTL-5            | T343           | Control   | 62         | Male          | 496                  | 1,301                       |
| CTL-6            | T4812          | Control   | 36         | Male          | 517                  | 1,225                       |

Dx: diagnosis, SCA3: spinocerebellar ataxia type 3, PMI: post-mortem interval, n/a: not available



**Appendix Table S3. Clinical features of SCA3 cases and control individuals described in this study.**

| <b>Variable</b>                       | <b>Control</b> | <b>SCA3</b> |
|---------------------------------------|----------------|-------------|
| <b><i>n</i></b>                       | 6              | 6           |
| <b>Age at death (years)</b>           | 52.2 ± 11.1    | 51.8 ± 9.5  |
| <b>Male</b>                           | 4 (66.7%)      | 4 (66.7%)   |
| <b>Female</b>                         | 2 (33.3%)      | 2 (33.3%)   |
| <b>Brain Weight (grams)</b>           | 1,297 ± 279    | 1,308 ± 266 |
| <b>Post Mortem Interval (minutes)</b> | 1,142 ± 957    | 1,131 ± 520 |

## Appendix Reference

1. Collier S, Gubb D (1997) *Drosophila* tissue polarity requires the cell-autonomous activity of the fuzzy gene, which encodes a novel transmembrane protein. *Development* **124**: 4029-4037
