# Supplementary material
Source: PubMed Central journal article supplement (PMC6123661)

# Source data for Figure 1

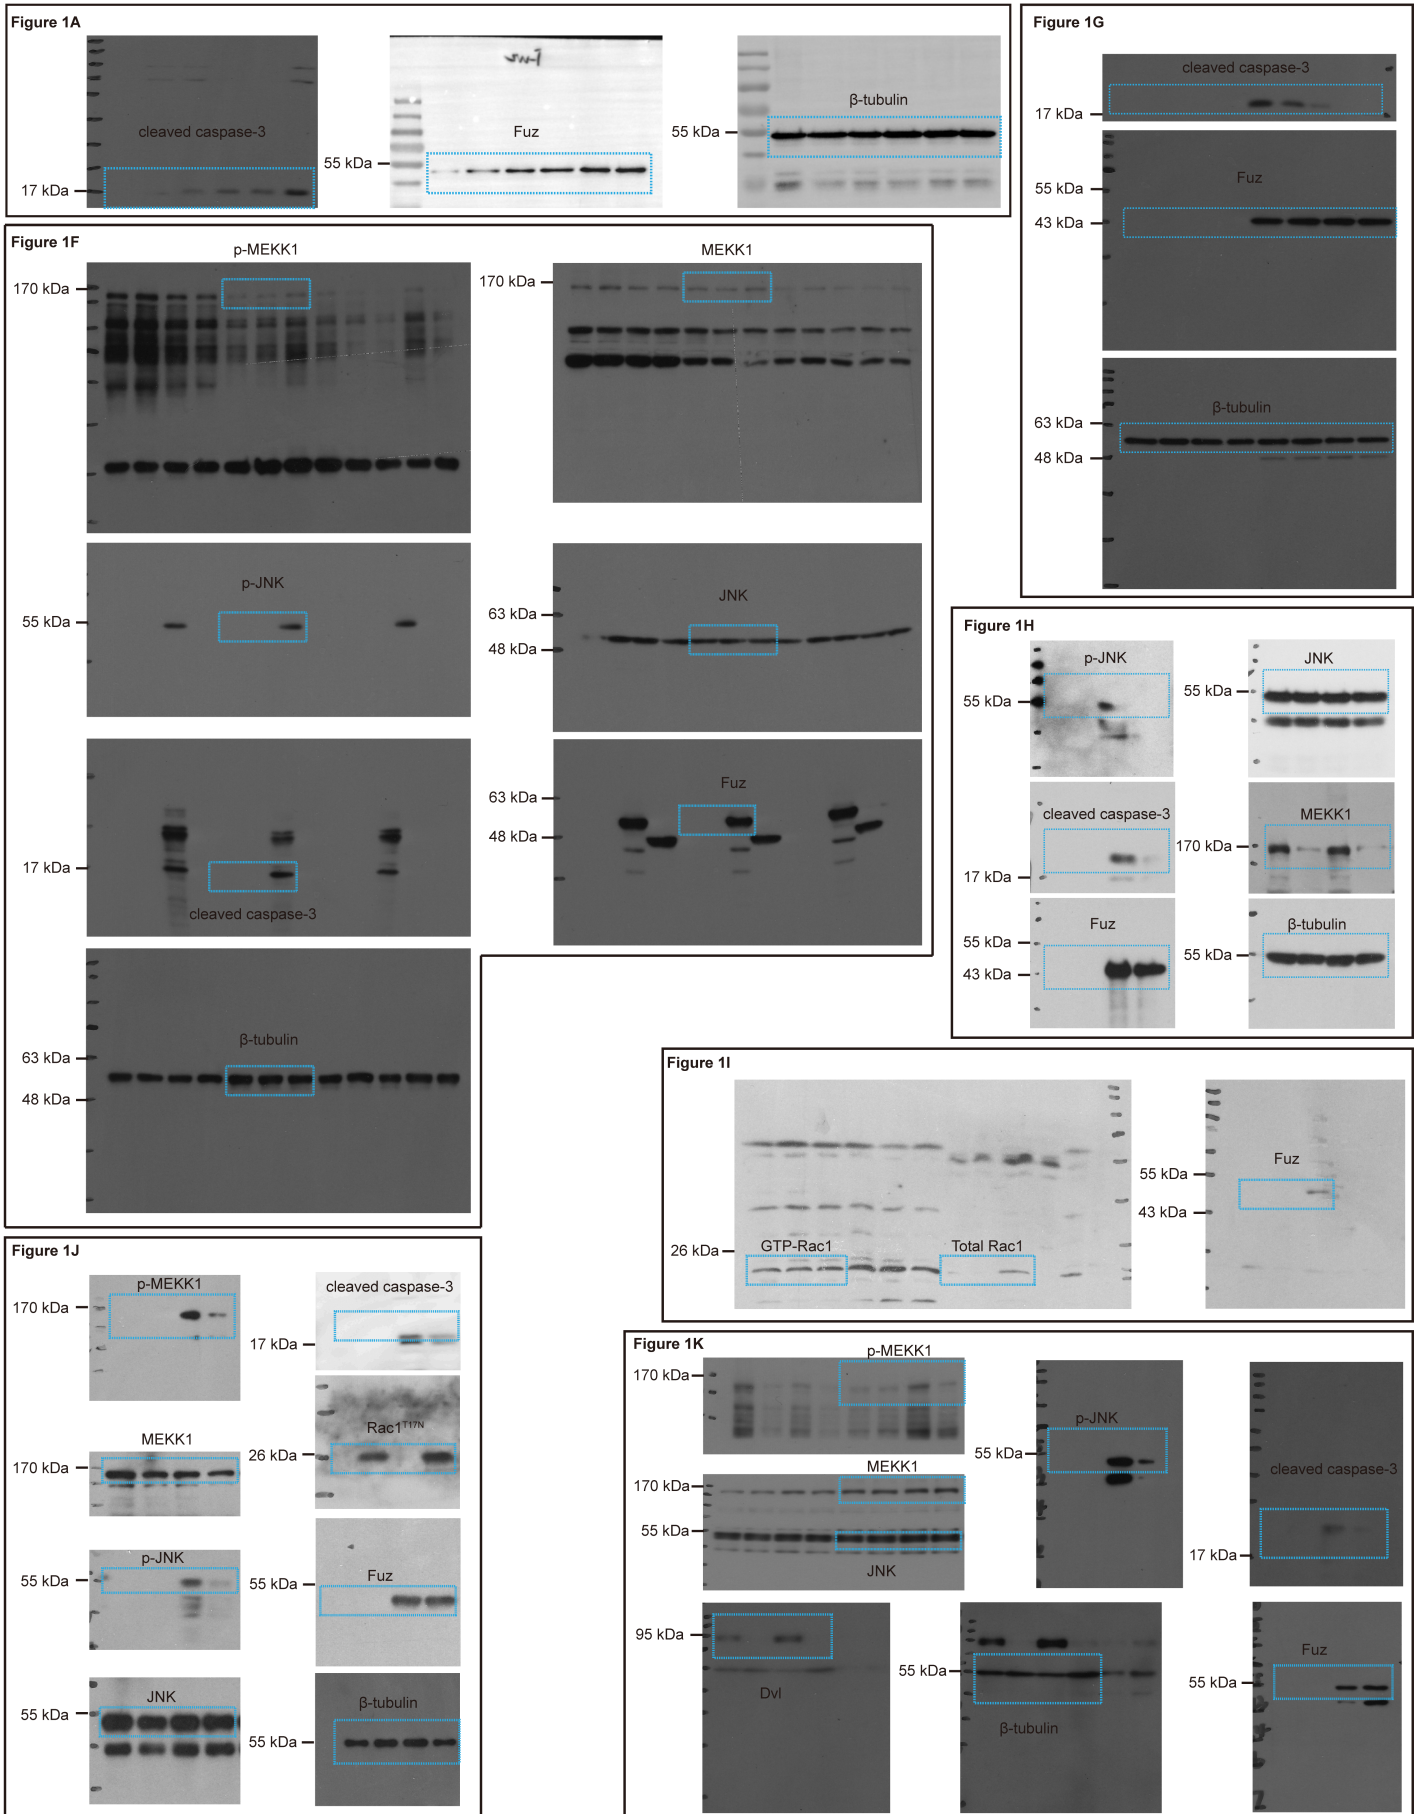

Supplement: EMBR-19-e45409-s003.pdf [file EMBR-19-e45409-s003.pdf]

# Source data for Figure 2

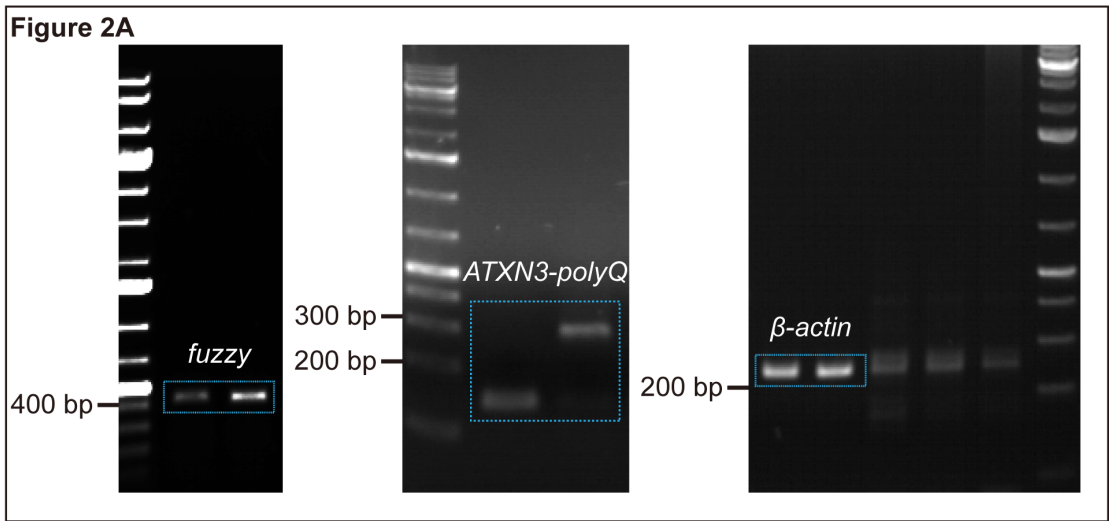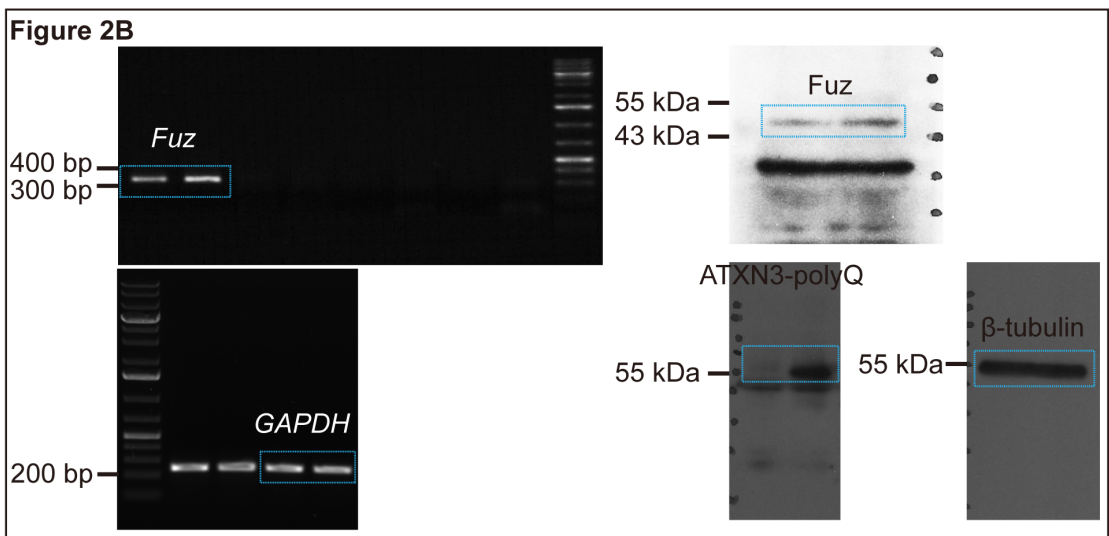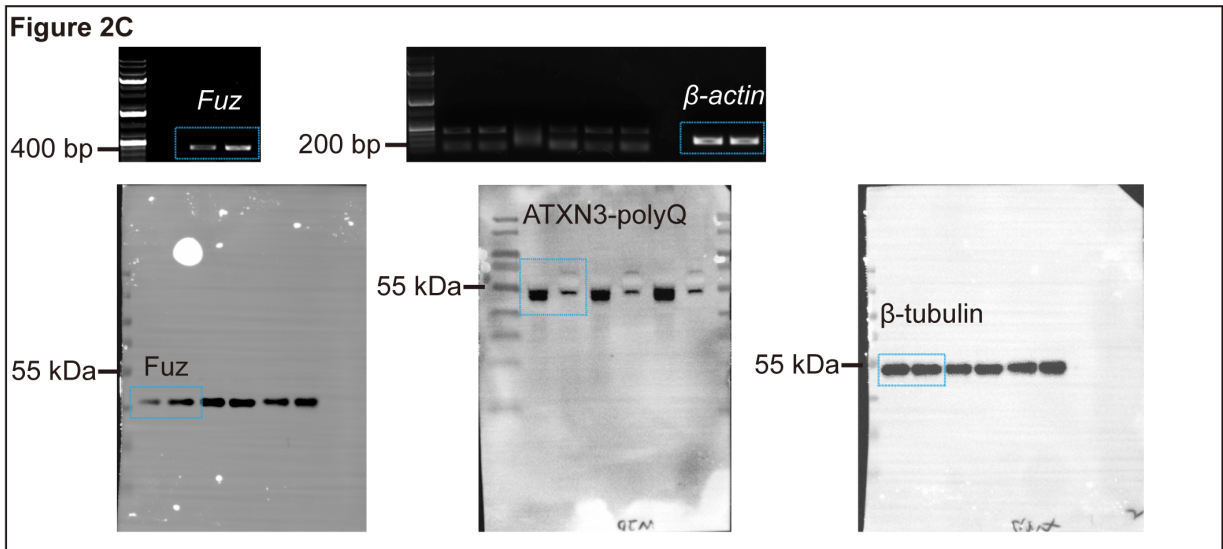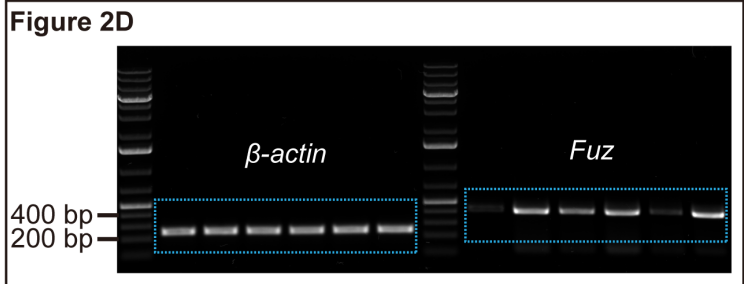

Supplement: EMBR-19-e45409-s004.pdf [file EMBR-19-e45409-s004.pdf]

# Source data for Figure 3

**Figure 3B**

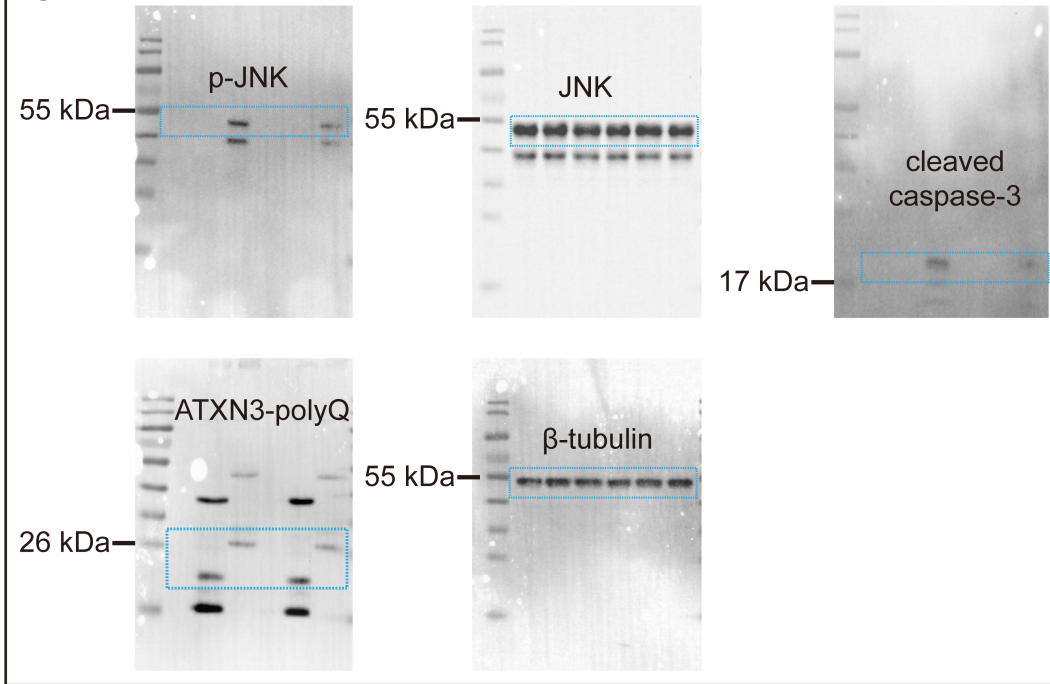

**Figure 3C**

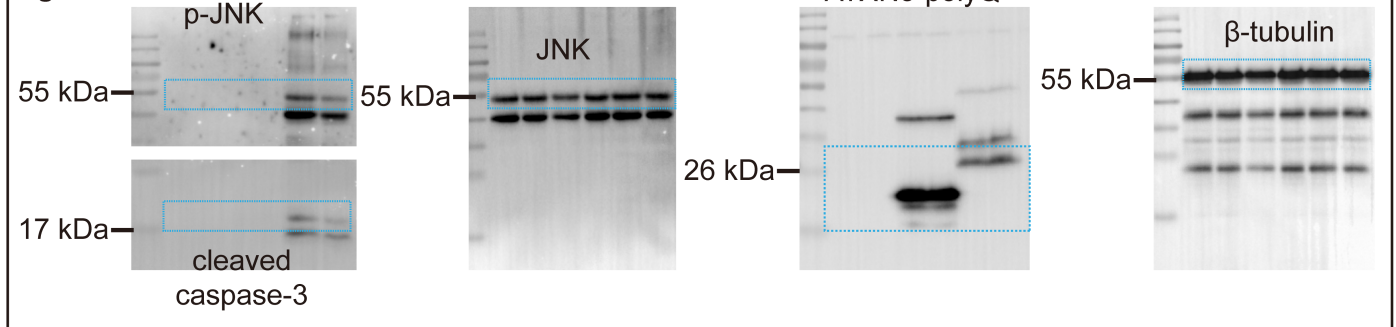

**Figure 3D**

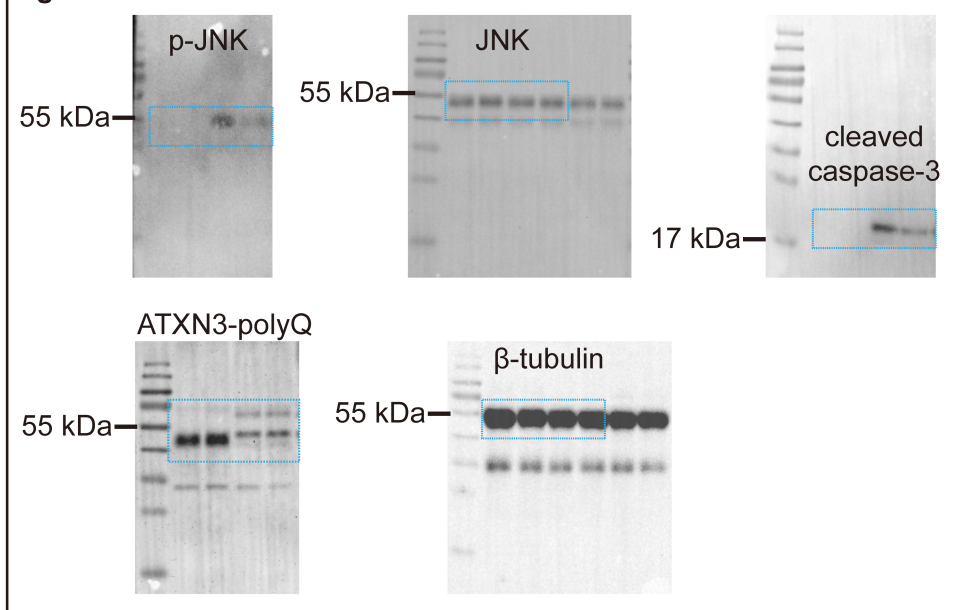

Supplement: EMBR-19-e45409-s005.pdf [file EMBR-19-e45409-s005.pdf]

# Source data for Figure 4

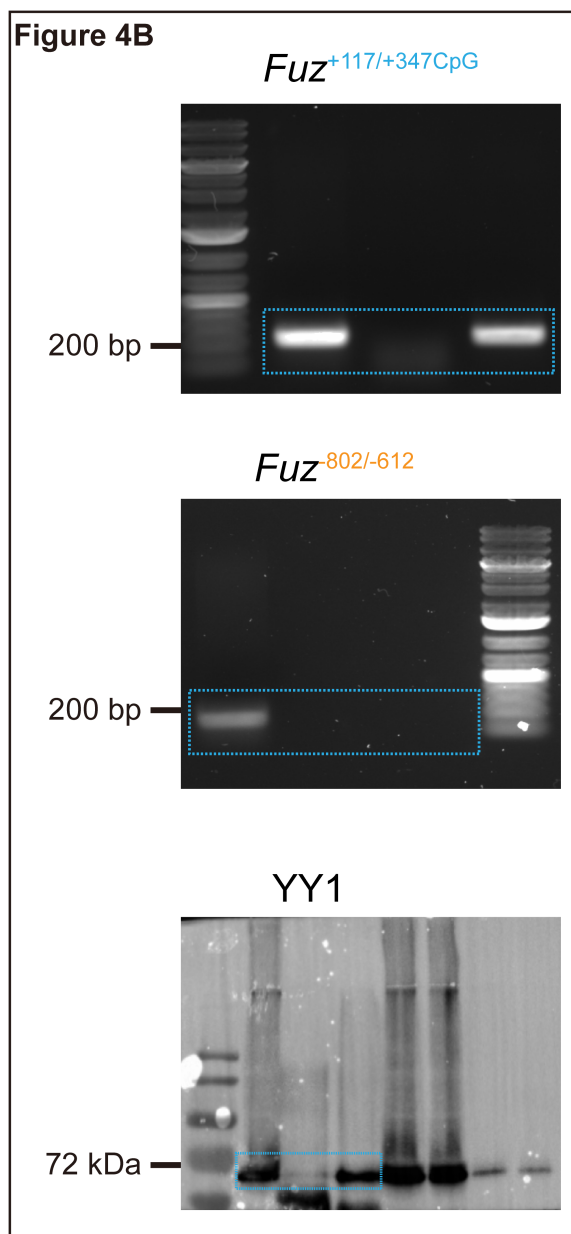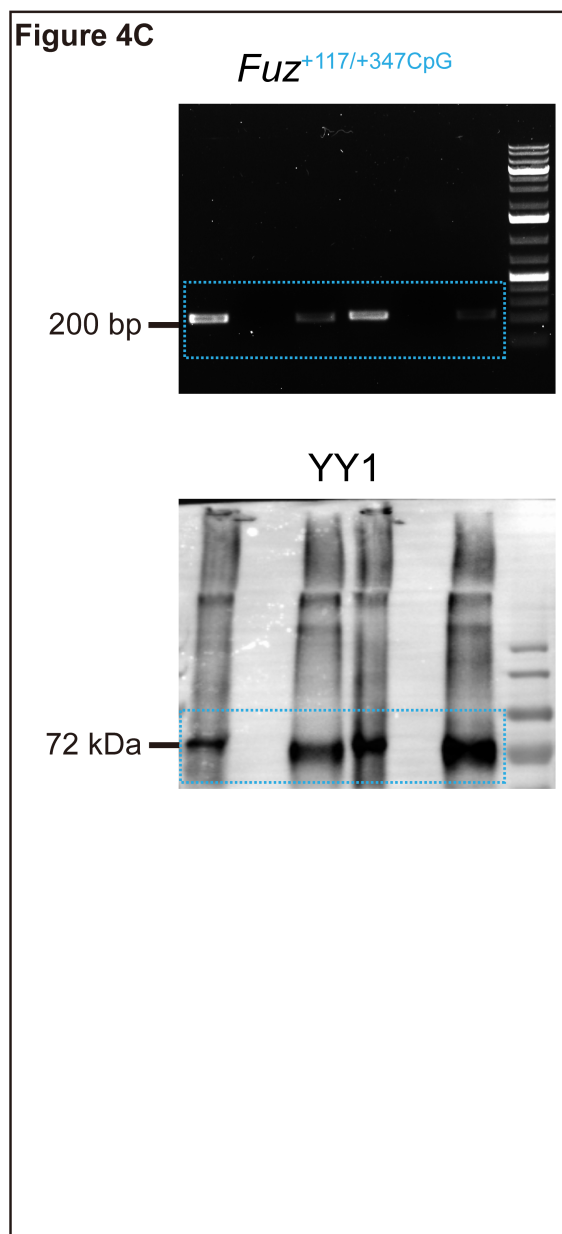

Supplement: EMBR-19-e45409-s006.pdf [file EMBR-19-e45409-s006.pdf]

# Source data for Figure 5

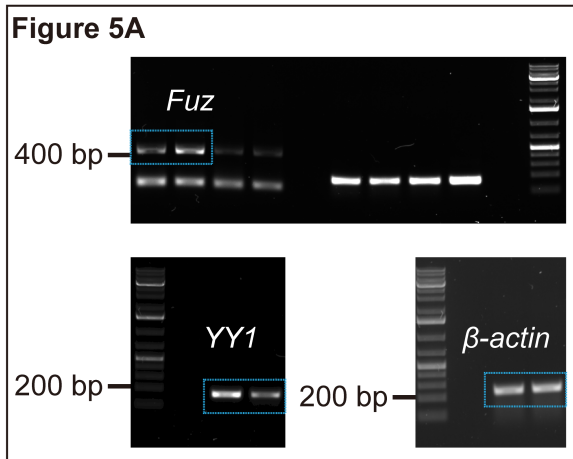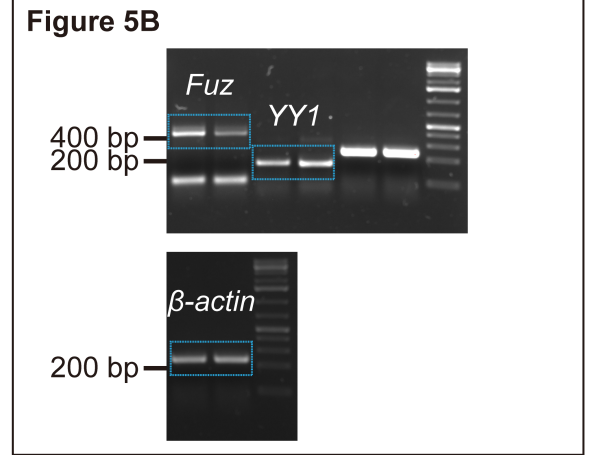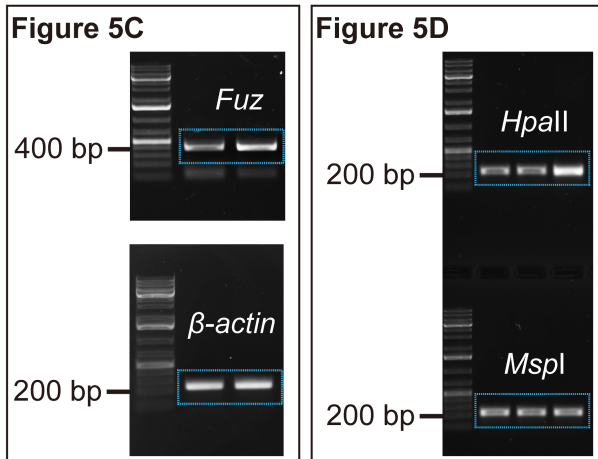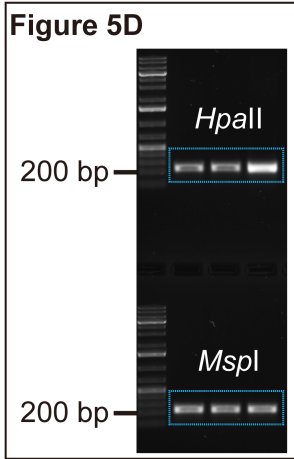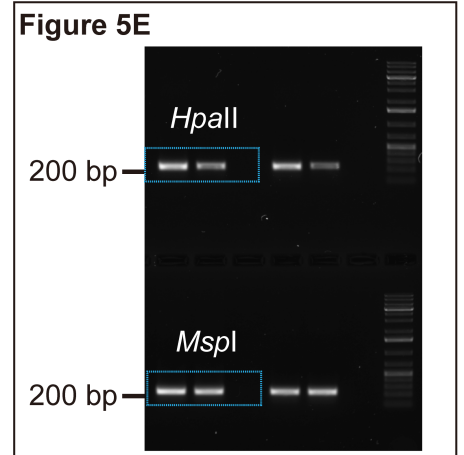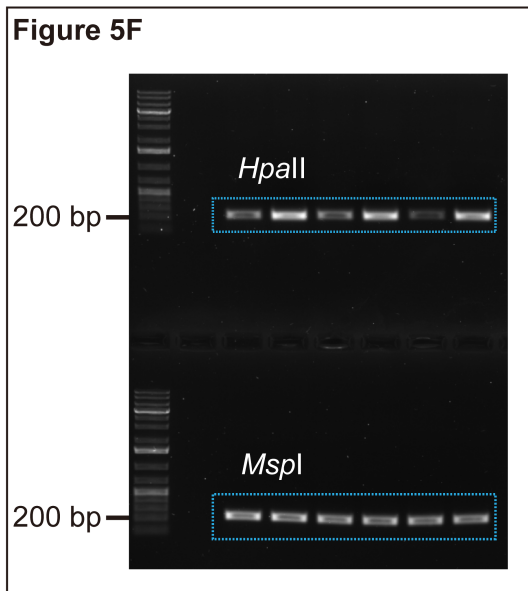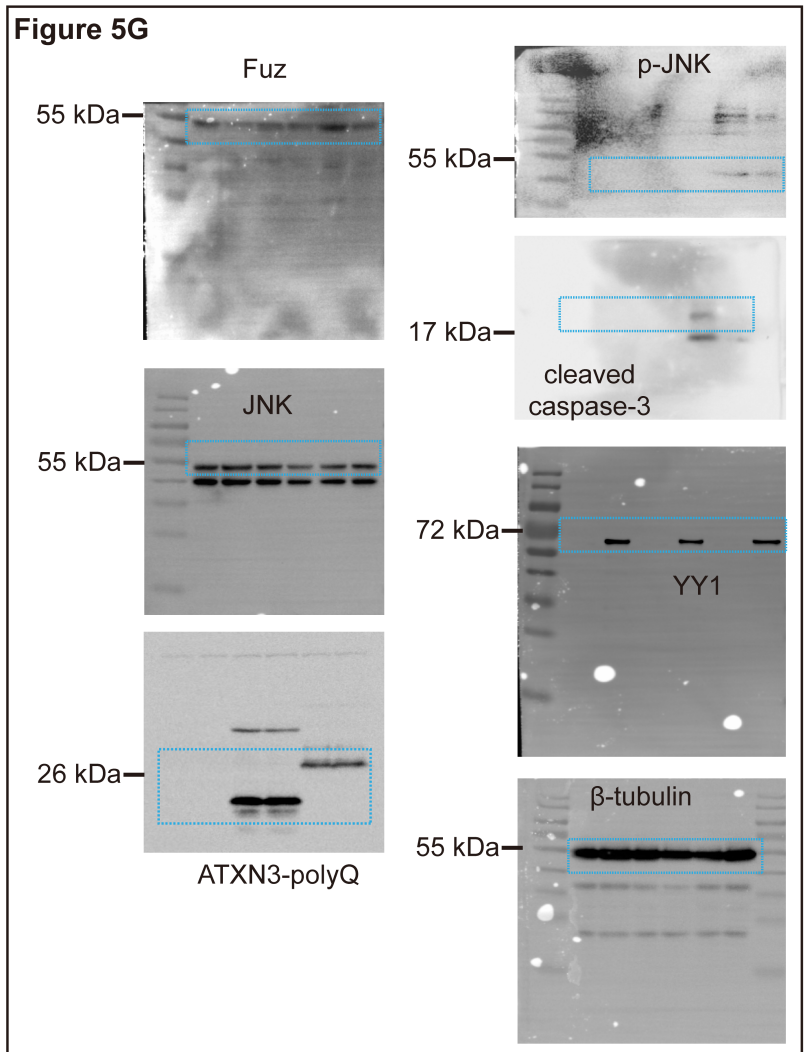

Supplement: EMBR-19-e45409-s007.pdf [file EMBR-19-e45409-s007.pdf]

# Source data for Figure 6

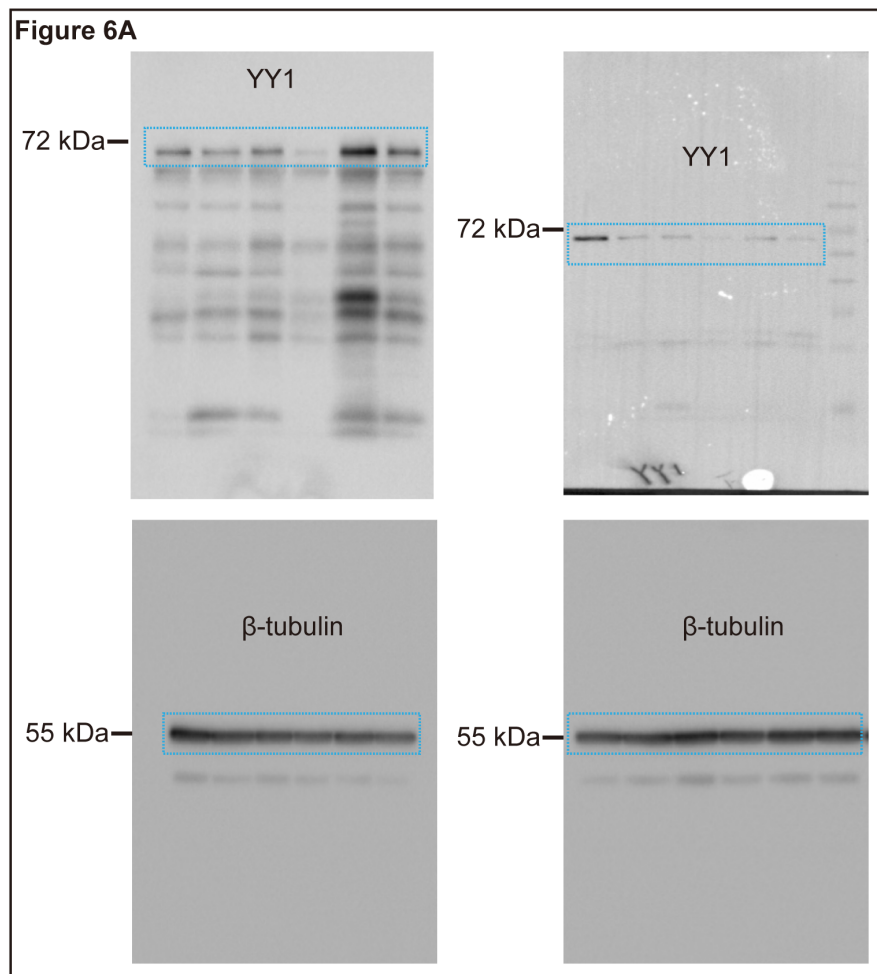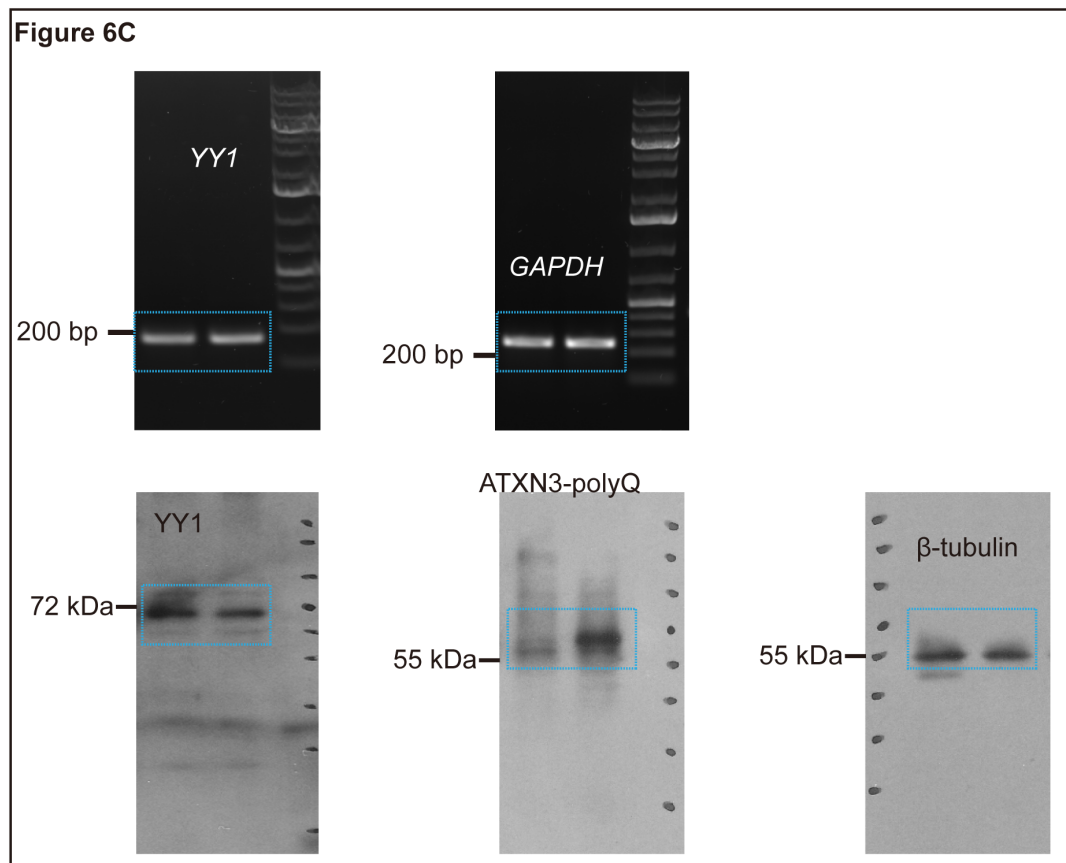

Supplement: EMBR-19-e45409-s008.pdf [file EMBR-19-e45409-s008.pdf]

# Source data for Figure 7

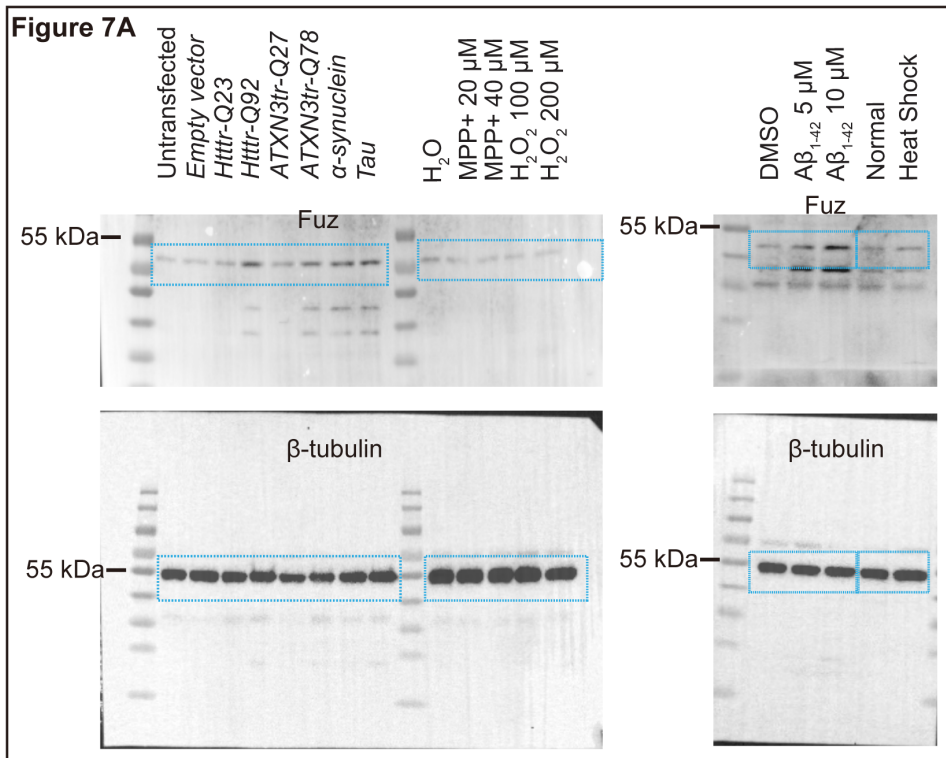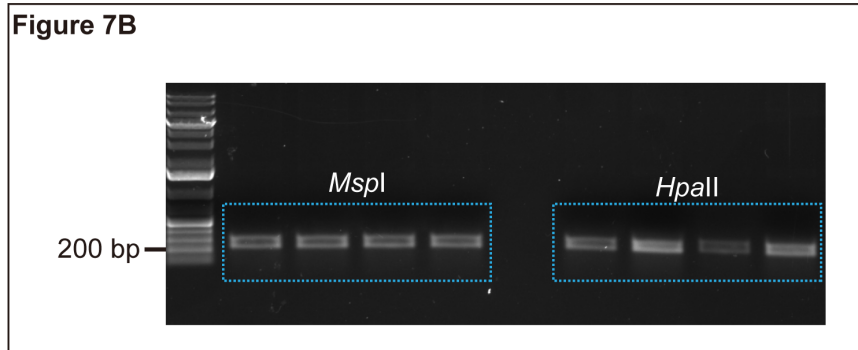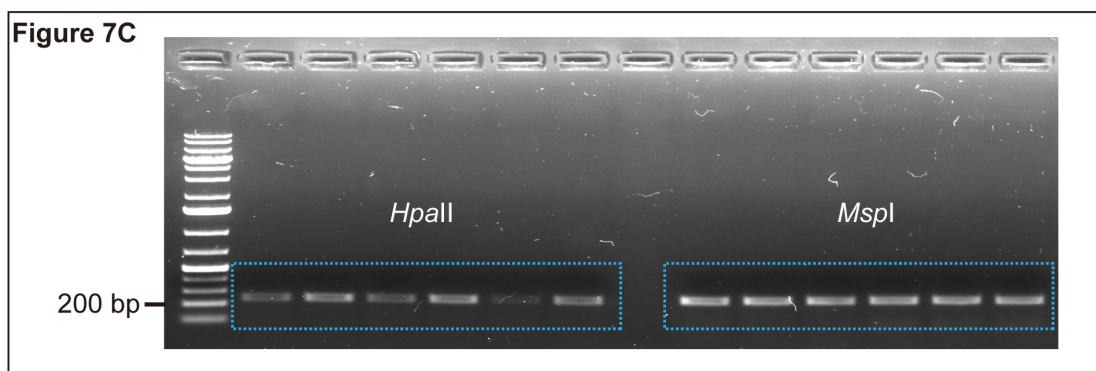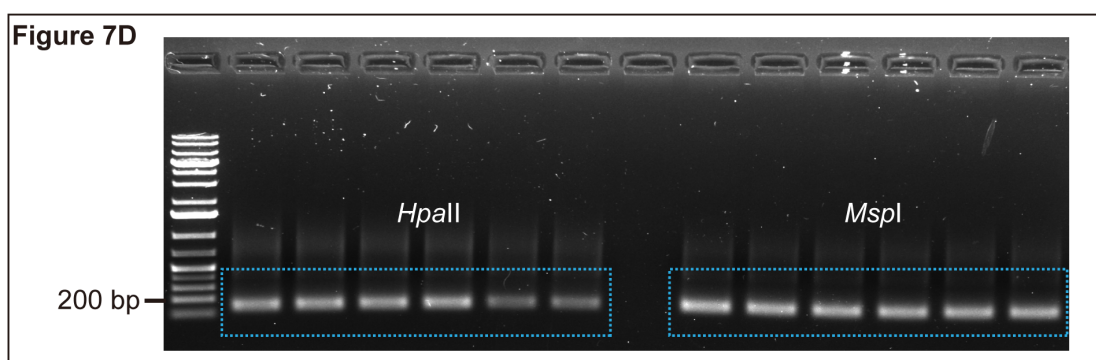

Supplement: EMBR-19-e45409-s009.pdf [file EMBR-19-e45409-s009.pdf]
